# Supplementary material for: Mapping Differentiation under Mixed Culture Conditions Reveals a Tunable Continuum of T Cell Fates
Source: PLOS journal article supplement (doi:10.1371/journal.pbio.1001616), 2013-07-30

Figure S18

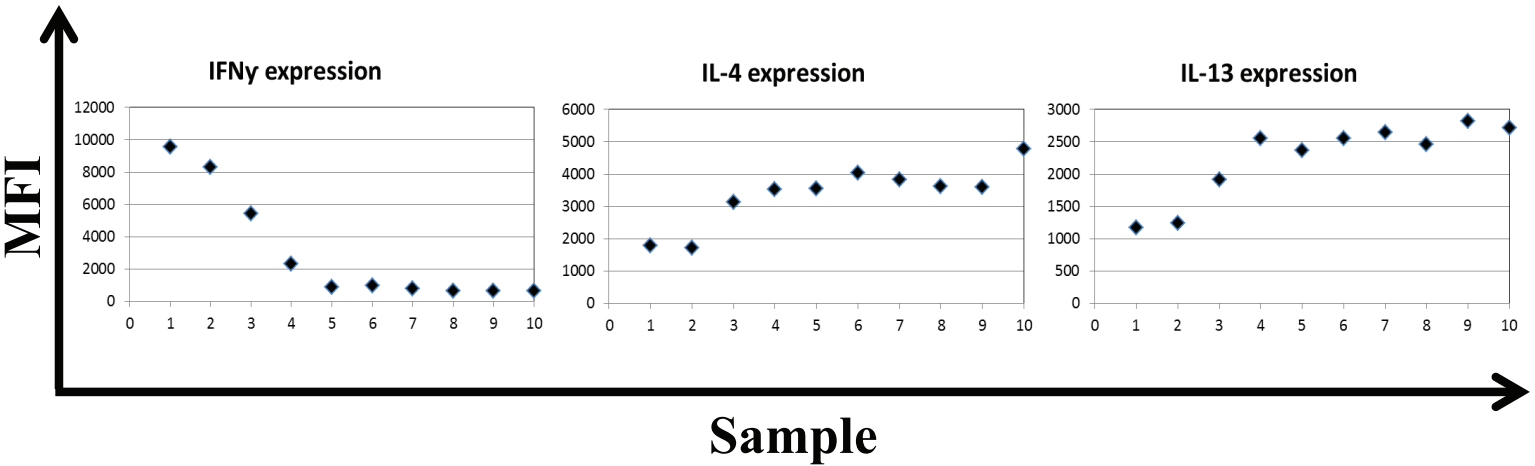

Supplement: S18 (10.1371/journal.pbio.1001616.s018) [file journal.pbio.1001616.s018]
